# Supplementary material for: The Effect of Silane Coupling Agent on the Texture and Properties of In Situ Synthesized PI/SiO2 Nanocomposite Film
Source: MDPI journal article supplement (doi:10.3390/nano12020286), 2022-01-17
Supplement: s1 [file s1]

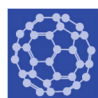

# The Effect of Silane Coupling Agent on the Texture and Properties of In Situ Synthesized PI/SiO<sub>2</sub> Nanocomposite Film

Jindong Huang <sup>1,2</sup>, Hong Chen <sup>1</sup>, Guanglu Zhang <sup>1,2</sup>, Xiaowei Fan <sup>1,3</sup> and Juncheng Liu <sup>1,\*</sup>

<sup>1</sup> School of Materials Science and Engineering, Tiangong University, Tianjin 300387, China; jdhuang@tiangong.edu.cn (J.H.); chen393994@gmail.com (H.C.); zgltg@tiangong.edu.cn (G.Z.); xiaowei\_fan@126.com (X.F.)

<sup>2</sup> School of Physical Science and Technology, Tiangong University, Tianjin 300387, China

<sup>3</sup> Tianjin SYP Engineering Glass Co., Ltd., Tianjin 300402, China

\* Correspondence: jchliu@tiangong.edu.cn; Tel.: +86-(0)-22-83-955-811

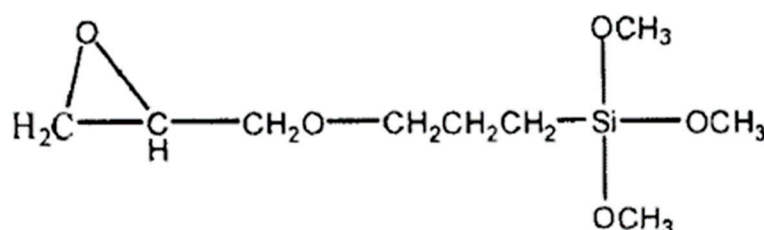

**Figure S1.** The molecular structure of KH-560.

**Table S1.** Composition of PI/SiO<sub>2</sub> composite film obtained by using different additive amount of silane coupling agent.

| Sample       | Mass (g)         |       |       |        | Coupling agent accounts for SiO <sub>2</sub> mass percentage (%) | SiO <sub>2</sub> mass percentage (%) | Solid content of PAA solution (%) |
|--------------|------------------|-------|-------|--------|------------------------------------------------------------------|--------------------------------------|-----------------------------------|
|              | SiO <sub>2</sub> | TFDB  | 6FDA  | DMAc   |                                                                  |                                      |                                   |
| PI           | 0                | 3.203 | 4.532 | 77.735 | 0                                                                | 0                                    | 9.95                              |
| PIS10        | 0.877            | 3.210 | 4.531 | 77.743 | 0                                                                | 10.17                                | 9.98                              |
| PIS10-560-1  | 0.876            | 3.206 | 4.530 | 77.741 | 1.02                                                             | 10.17                                | 9.95                              |
| PIS10-560-3  | 0.878            | 3.207 | 4.529 | 77.740 | 3.05                                                             | 10.19                                | 9.95                              |
| PIS10-560-6  | 0.878            | 3.209 | 4.532 | 77.743 | 6.01                                                             | 10.18                                | 9.96                              |
| PIS10-560-10 | 0.878            | 3.208 | 4.531 | 77.742 | 10.03                                                            | 10.19                                | 9.95                              |

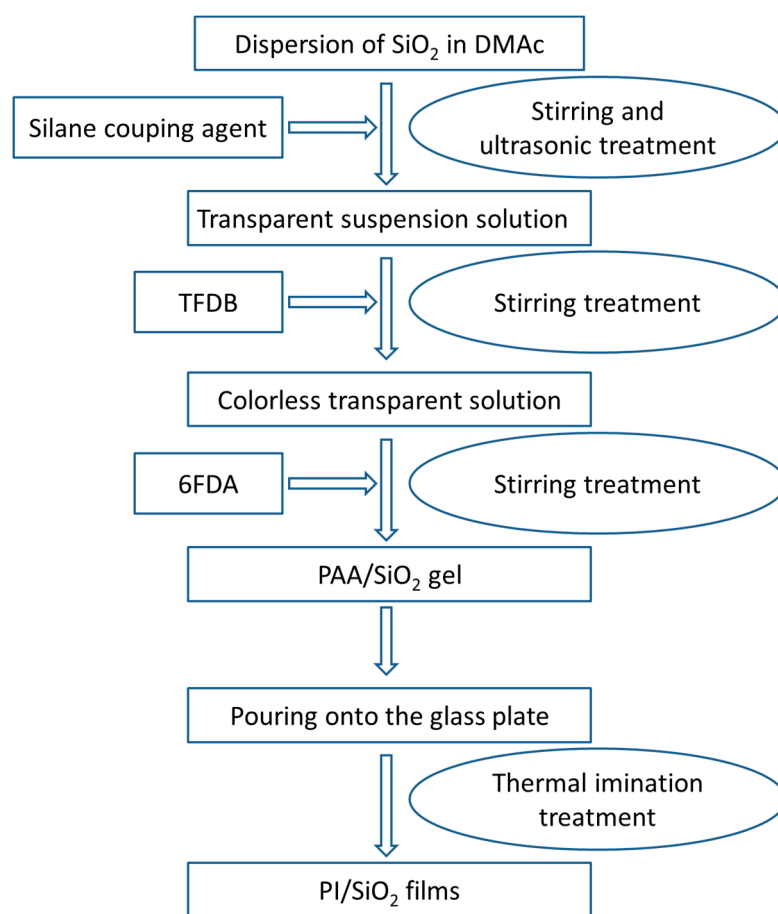

**Figure S2.** The schematical diagram of PI/SiO<sub>2</sub> films.

**Table S2.** The transmittance of PI/SiO<sub>2</sub> films before and after irradiation.

| Sample       | Maximum Transmittance (%) |       | Attenuation Rate (%) |
|--------------|---------------------------|-------|----------------------|
|              | Before                    | After |                      |
| <b>PIS10</b> | 87.6                      | 86.3  | 1.48                 |
| PIS10-560-1  | 86.6                      | 85.4  | 1.38                 |
| PIS10-560-3  | 86.9                      | 85.7  | 1.38                 |
| PIS10-560-5  | 85.2                      | 84.1  | 1.29                 |
| PIS10-560-10 | 84.9                      | 83.8  | 1.29                 |
